# Supplementary material
Source: Springer Nature journal article supplement (https://www.springermedizin.de/resource/supplementary/12985_2010_1082_MOESM2_ESM.pdf/9609104)
Supplement: MOESM2 [file 9609104]

10 20 30 40 50 60 70  
Segment1\_Clone6 TCAAAGAGTGT TTTTCAATATTGCTGTTGTTTCTTTGTTGTAAAGTCTTTGACGATAC TTTTAAAT . . . . .  
Segment1\_Clone8 TCAAAGAGTGT TTTTCAATATTGCTGTTGTTTCTTTGTTGTAAAGTCTTTGACGATAC TTTTAAAT . . . . .  
Segment1\_Clone7 TCAAAGAGTGT TTTTCAATATTGCTGTTGTTTCTTTGTTGTAAAGTCTTTGACGATAC TTTTAAAT AAAA TAA  
Segment1\_Clone3 TCAAAGAGTGT TTTTCAATATTGCTGTTGTTTCTTTGTTGTAAAGTCTTTGACGATAC TTTTAAAT AAAA TAA  
Segment1\_Clone4 TCGGTGGGTGT TTTTCAAGTATTGCTGTTGTTTCTTTGTTGTAAAGTCTTTGACGATAC TTTTAAAT AAAA TAA

10 20 30 40 50 60 70  
Segment2\_Clone7 TTTTGTTGTGATGGTGTATATAACCC TTTTGATTAAATAAAGTGTGTGTAATAACGAAATTGACGATATA TTTTAAATAAGT  
Segment2\_Clone8 TTTTGTTGTGATGGTGTATATAACCC TTTTGATTAAATAAAGTGTGTGTAATAACGAAATTGACGATATA TTTTAAATAAGT  
Segment2\_Clone6 TTTTGTTGTGATGGTGTATATAACCC TTTTGATTAAATAAAGTGTGTGTAATAACGAAATTGACGATATA TTTTAAATAAGT  
Segment2\_Clone2 TTTTGTTGTGATGGTGTATATAACCC TTTTGATTAAATAAAGTGTGTGTAATAACGAAATTGACGATATA TTTTAAATAAGT  
Segment2\_Clone3 TTTTGTTGTGATGGTGTATATAACCC TTTTGATTAAATAAAGTGTGTGTAATAACGAAATTGACGATATA TTTTCAATAAGT

10 20 30 40 50 60 70 80 90 100 110 120  
Segment3\_Clone6 AACTGCACATAGTGAATTAAC TAGTTACTCTATGTTATGATACAC TTAAGTGAACATGATATAA TTTGGGTTTGGG TATTATTA TTTAAAT TAAAT TGTACGG TATTGACGATA TTTACAAAT . . . . .  
Segment3\_Clone8 AACTGCACATAGTGAATTAAC TAGTTACTCTATGTTATGATACAC TTTAAATGAACATGATATAA TTTGGGTTTGGG TATTATTA TTTAAAT TAAAT TGTACGG TATTGACGATA TTTACAAAT . . . . .  
Segment3\_Clone7 AACTGCACATAGTGAATTAAC TAGTTACTCTATGTTATGATACAC TTTAAATGAACATGATATAA TTTGGGTTTGGG TATTATTA TTTAAAT TAAAT TGTACGG TATTGACGATA TTTACAAAT AAAA  
Segment3\_Clone2 AACTGCACATAGTGAATTAAC TAGTTACTCTATGTTATGATACAC TTTAAATGAACATGATATAA TTTGGGTTTGGG TATTATTA TTTAAAT TAAAT TGTACGG TATTGACGATA TTTAC . . . . .  
Segment3\_Clone3 AACTGCACATAGTGAATTAAC TAGTTACTCTATGTTATGATACAC TTTAAATGAACATGATATAA TTTGGGTTTGGG TATTATTA TTTAAAT TAAAT TGTACGG TATTGACGATA TTTAC . . . . .

10 20 30 40 50  
Segment4\_Clone2 GTTGTGTTGTTTACTTGTAATAATTGTTGTGT TTTGACGATATGTATTTTCCA . . . . .  
Segment4\_Clone4 GTTGTGTTGTTTACTTGTAATAATTGTTGTGT TTTGACGATATGTATTTTCCA . . . . .  
Segment4\_Clone5 GTTGTGTTGTTTACTTGTAATAATTGTTGTGT TTTGACGATATGTATTTTCCAAAAA . . . . .  
Segment4\_Clone3 GTTGTGTTGTTTACTTGTAATAATTGTTGTGT TTTGACGATATGTATTTTCCAAAAA . . . . .  
Segment4\_Clone1 GTTGTGTTGTTTACTTGTAATAATTGTTGTGT TTTGACGATATGTATTTTCCAAAAA . . . . .

10 20 30 40 50 60 70 80 90 100 110 120  
Segment5\_Clone2 ATTGCTTTCTGCTGGTTTTTCTCTGTACATAAC TTATATTTGTTTCAAGGATTTTGTATGTATTAGGACC TTTATTTGGATAATTTAGAAATCTGTATTTGATTATGCATTATTAATTGTAT . . . . .  
Segment5\_Clone3 ATTGCTTTCTGCTGGTTTTTCTCTGTACATAAC TTATATTTGTTTCAAGGATTTTGTATGTATTAGGACC TTTATTTGGATAATTTAGAAATCTGTATTTGATTATGCATTATTAATTGTAT . . . . .  
Segment5\_Clone6 ATTGCTTTCTGCTGGTTTTTCTCTGTACATAAC TTATATTTGTTTCAAGGATTTTGTATGTATTAGGACC TTTATTTGGATAATTTAGAAATCTGTATTTGATTATGCATTATTAATTGTAT . . . . .  
Segment5\_Clone8 ATTGCTTTCTGCTGGTTTTTCTCTGTACATAAC TTATATTTGTTTCAAGGATTTTGTATGTATTAGGACC TTTATTTGGATAATTTAGAAATCTGTATTTGATTATGCATTATTAATTGTATATAAAA  
Segment5\_Clone7 ATTGCTTTCTGCTGGTTTTTCTCTGTACATAAC TTATATTTGTTTCAAGGATTTTGTATGTATTAGGACC TTTATTTGGATAATTTAGAAATCTGTATTTGATTATGCATTATTAATTGTAT . . . . .

10 20 30 40 50 60 70 80 90 100 110 120  
Segment6\_Clone3 TTATGAAAAGAAAGACAACATAGTTAAAAGTTAATGAGTGTATTC TAATGTATTTTAA TTTAAAGATGATGTAATAATTTTGGTGAAGACGTTCTTGATGTTGTACGTTTACAG . . . . .  
Segment6\_Clone5 TTATGAAAAGAAAGACAACATAGTTAAAAGTTAATGAGTGTATTC TAATGTATTTTAA TTTAAAGATGATGTAATAATTTTGGTGAAGACGTTCTTGATGTTGTACGTTTACA . . . . .  
Segment6\_Clone2 TTATGAAAAGAAAGACAACATAGTTAAAAGTTAATGAGTGTATTC TAATGTATTTTAA TTTAAAGATGATGTAATAATTTTGGTGAAGACGTTCTTGATGTTGTACGTTTACAGAAAA  
Segment6\_Clone4 TTATGAAAAGAAAGACAACATAGTTAAAAGTTAATGAGTGTATTC TAATGTATTTTAA TTTAAAGATGATGTAATAATTTTGGTGAAGACGTTCTTGATGTTGTACGTTTACAGAAA . . . . .  
Segment6\_Clone1 TTATGAAAAGAAAGACAACATAGTTAAAAGTTGTTGAGTGTATTC TAATGTATTTTAA TTTAAAGATGATGTTGTTGTTGTTTGGTGAAGACGTTCTTGATGTTGTACGTTTACAGAA . . . . .

10 20 30 40 50 60 70 80  
Segment7\_Clone1 AGTTAGCTTTGTGATCTAAAAAGTAAC TAATGACAAAAATATGATTTATGTTGTACATGGTGTGATGATAATTTTAAAACG . . . . .  
Segment7\_Clone2 AGTTAGCTTTGTGATCTAAAAAGTAAC TAATGACAAAAATATGATTTATGTTGTACATGGTGTGATGATAATTTTAAAACG . . . . .  
Segment7\_Clone3 AGTTAGCTTTGTGATCTAAAAAGTAAC TAATGACAAAAATATGATTTATGTTGTACATGGTGTGATGATAATTTTAAAACG . . . . .  
Segment7\_Clone6 AGTTAGCTTTGTGATCTAAAAAGTAAC TAATGACAAAAATATGATTTATGTTGTACATGGTGTGATGATAATTTTAAAACGAA  
Segment7\_Clone4 AGTTAGCTTTGTGATCTAAAAAGTAAC TAATGACAAAAATATGATTTATGTTGTACATGGTGTGATGATAATTTTAAAACG . . . . .

10 20 30 40 50 60 70 80 90 100 110 120  
Segment8\_Clone2 ATTAATCATCTCAA TACTCATTATGTTATAC TAAATTTGGTATGAACTTAAAGATTTCTTGTGTTTCAATTTCTATGTGTTGAATGGGATATTTGGGTTGTACTTGATCATTAACAAAAGATA  
Segment8\_Clone5 ATTAATCATCTCAA TACTCATTATGTTATAC TAAATTTGGTATGAACTTAAAGATTTCTTGTGTTTCAATTTCTATGTGTTGAATGGGATATTTGGGTTGTACTTGATCATTAACAAAAGATA  
Segment8\_Clone3 ATTAATCATCTCAA TACTCATTATGTTATAC TAAATTTGGTATGAACTTAAAGATTTCTTGTGTTTCAATTTCTATGTGTTGAATGGGATATTTGGGTTGTACTTGATCATTAACAAAAGAT . . . . .  
Segment8\_Clone4 ATTAATCATCTCAA TACTCATTATGTTATAC TAAATTTGGTATGAACTTAAAGATTTCTTGTGTTTCAATTTCTATGTGTTGAATGGGATATTTGGGTTGTACTTGATCATTAACAAAAGAT . . . . .  
Segment8\_Clone1 ATTTGTTATCTCAGTACTCATTATGTTATAC TAAATTTGGTATGAACTTAAAGATTTCTTGTGTTTCAATTTCTATGTGTTGAATGGGATATTTGGGTTGTACTTGATCATTAACAAAAGAT . . . . .
